1  
2  
3  
4  
5  
6  
7  
8  
9  
10  
11  
12  
13  
14  
15  
16  
17  
18  
19  
20  
21  
22  
23

**Seasonal song variation in male Carolina Wrens (*Thryothorus ludovicianus*)**

Holly R. Keating<sup>1</sup> and Dustin G. Reichard<sup>1\*</sup>

<sup>1</sup>Ohio Wesleyan University, Department of Zoology, 61 S Sandusky St, Delaware, OH 40315

\*Corresponding Author email: [dgreicha@owu.edu](mailto:dgreicha@owu.edu); 740-368-2890

24 **ABSTRACT**—Birdsong’s primary function is attracting and stimulating mates and repelling  
25 rivals during the breeding season. However, many species also sing during the nonbreeding  
26 season, which raises questions about the function of nonbreeding song and the proximate  
27 mechanisms underlying its production. In this study, we compared spectral and temporal  
28 measurements from a large sample of breeding ( $N = 267$ ) and nonbreeding songs ( $N = 283$ ) of  
29 Carolina Wrens (*Thryothorus ludovicianus*), a nonmigratory, temperate species that sings year-  
30 round. We found that breeding songs were longer than nonbreeding songs and had more  
31 syllables within each song. Trill rate, the number of notes per syllable, minimum and maximum  
32 frequency and frequency bandwidth did not differ detectably between the two seasons. This  
33 study is the first to examine seasonal song differences in Carolina Wrens and provides a basis for  
34 future investigations into the drivers behind this seasonal variation.

35

36 **Key words:** seasonal variation, song length, territoriality, songbird, annual cycle, bioacoustics,  
37 wren

38

39

40

41

42

43

44

45

46

47           The majority of research on avian vocal behavior has focused on male songs during the  
48 breeding season in north temperate climates (Catchpole and Slater 2008). This bias has led to the  
49 assumption that most songbirds primarily sing to attract mates and repel rivals during breeding  
50 with songs being replaced by calls or silence for the remainder of the year. However, many  
51 species of both temperate and tropical songbirds are known to sing outside the breeding season  
52 (reviewed in Gahr 2020), including migratory species that sing on their wintering grounds  
53 (Sorensen et al. 2016). Despite the abundance of nonbreeding songs, the seasonality of song  
54 production and structure has been studied quantitatively in very few species. In those species that  
55 have been studied, seasonal changes in song complexity and structure such as song length,  
56 syllable repetition rates, syllable consistency, and repertoire composition are inconsistent and  
57 species specific (Gahr 2020). Expanding our focus to nonbreeding songs will provide a more  
58 complete understanding of the proximate mechanisms underlying song production as well as the  
59 full array of functions that songs might serve.

60           Carolina Wrens (*Thryothorus ludovicianus*) are nonmigratory songbirds found across the  
61 eastern United States and Mexico that sing during the breeding and nonbreeding seasons (Fig. 1).  
62 Unlike most temperate songbirds, Carolina Wrens form long-term pair bonds and both members  
63 of the pair engage in territorial defense year-round (Morton and Shalter 1977, Haggerty et al.  
64 2001). Only males sing, and each individual produces a repertoire of 17-55 (mean = 32) unique  
65 song types (Fig. 1; Morton 1987). Song functions in territorial behavior, but song production  
66 seems to increase at the onset of the breeding season, suggesting an additional function in  
67 courtship and mate stimulation (Haggerty and Morton 2020). A function in mate attraction is less  
68 clear given that pair bonds can form in the first few months of life before males fully develop a

69 crystallized song (Morton 1982). Despite this persistent vocal behavior, seasonal variation in the  
70 structure of Carolina Wren song has yet to be quantified.

71 In this study, we compared breeding and nonbreeding Carolina Wren songs across a large  
72 geographic scale using recordings from online databases. We hypothesized that songs would  
73 differ between the breeding and nonbreeding seasons. Specifically, we predicted that breeding  
74 season songs would be longer and more complex (more notes/syllable, higher entropy) due to  
75 song's presumed function in courtship and mate stimulation during breeding. In addition,  
76 nonbreeding songs may be shorter and less complex due to seasonal reductions in the size of  
77 brain nuclei responsible for song production even in species that sing all year (Smith et al. 1995,  
78 1997; but see Leitner et al. 2001, Smulders 2005).

79

## 80 **Methods**

### 81 **Song Recordings**

82 We obtained recordings of Carolina Wren (*Thryothorus ludovicianus*) songs from the Florida  
83 Museum of Natural History (N = 49; WAV format), xeno-canto (N = 124; MP3 format;  
84 <https://www.xeno-canto.org/>), and the Macaulay Library (N = 377; WAV format;  
85 <https://www.macaulaylibrary.org>; see Supplementary Table S1). The recordings were collected  
86 between 1954-2020 throughout the Carolina Wren's range in Canada, the United States, and  
87 Mexico (Supplementary Table S1). We inspected each recording for accuracy and quality  
88 (signal-to-noise ratio). After removing misidentified and low-quality recordings, we cross  
89 referenced the metadata for each recording to remove duplicate songs that may have been  
90 uploaded to multiple databases. We also scrutinized the recording dates and locations to prevent

91 the same song type from the same individual from being sampled more than once. A total of 550  
92 unique songs were included in our analysis.

93         Based on the breeding phenology of Carolina Wrens (Haggerty and Morton 2020), the  
94 breeding season encompasses March to August ( $N = 267$ ) and the nonbreeding season is  
95 September to February ( $N = 283$ ). In the southern United States, egg laying begins in mid-March  
96 and ceases by mid-August, but pairs can continue to feed young as late as early October  
97 (Haggerty and Morton 2020). To ensure that our results were not skewed by samples from the  
98 transitional months between breeding and nonbreeding, we ran an identical analysis that  
99 excluded all recordings collected in February and September ( $N = 106$  songs excluded). The  
100 results of this analysis were qualitatively identical to our complete analysis included below  
101 (Table 1, Supplementary Table S2).

102

### 103 **Song Measurements**

104 We used Raven Pro 1.6 (Center for Conservation Bioacoustics, 2011) to measure song length,  
105 minimum and maximum frequency, frequency bandwidth, the number of inflection points,  
106 maximum entropy, and trill rate. A single observer (HRK) analyzed all songs and was blind to  
107 breeding season. We generated spectrograms of each recording (Hann Window, 512 DFT, 93.8  
108 Hz frequency resolution), and used the band limited energy detector to locate high quality songs.  
109 Then we randomly chose one song from each recording for analysis.

110         To minimize human bias, the start and end time for each song was determined by the  
111 energy detector, and we used the peak frequency contour function to measure the minimum and  
112 maximum frequency and the number of inflection points. The peak frequency contour function  
113 traces the peak frequency of a vocalization by measuring individual spectrogram slices through

114 time, which allows for automatic, less biased spectral measurements. The number of inflection  
115 points is calculated as the number of times the slope of the peak frequency contour changes signs  
116 across the entire song. Maximum entropy was calculated automatically.

117 We manually counted the number of syllables and notes per syllable for each song and  
118 trill rate was calculated as the number of syllables divided by song length. In a few cases ( $N =$   
119 30), the energy detector was unable to recognize songs in the recording despite a strong signal-  
120 to-noise ratio. When this occurred, we manually determined the start and end time by visually  
121 drawing a selection box around the song before collecting the remaining measurements with the  
122 peak frequency contour function.

123

## 124 **Statistical Analysis**

125 We conducted linear mixed models using the ‘lme4’ package in R v 4.0.2 (Bates et al. 2015; R  
126 Core Team, 2020) to compare breeding and nonbreeding songs. We used model selection by  
127 Akaike’s Information Criterion to assess the relative importance of latitude and sampling year as  
128 explanatory variables. For each song measurement, a series of models were created that  
129 contained the song measurement as the response variable, breeding status as a random factor, and  
130 latitude, sampling year, or both as independent factors. The models that included latitude alone  
131 were the only models to outperform the null model. We used a likelihood ratio test (LRT) to  
132 assess significance by comparing the likelihood of the full model that included latitude to that of  
133 a reduced model without breeding season.

134

135

136

137

## Results

138 Breeding male Carolina Wrens sang longer songs than non-breeding wrens (Table 1, Fig. 2,  $X^2_1 =$   
139 18.65,  $P < 0.001$ ) and had more syllables within each song (Table 1, Fig. 2,  $X^2_1 = 11.90$ ,  $P <$   
140 0.001). There was no difference between breeding and nonbreeding songs in minimum or  
141 maximum frequency, frequency bandwidth, the number of notes per syllable, trill rate, the  
142 number of inflection points within a song, or maximum entropy (Table 1).

143

144

## Discussion

145 Male Carolina Wrens sang longer songs with more syllables during the breeding season. This  
146 result was consistent with our predictions as well as previous seasonal comparisons from other  
147 species including both residents (e.g. Nuttall's White-crowned Sparrows [*Zonotrichia leucophrys*  
148 *nutalli*], Brenowitz et al. 1998; Wild Canaries [*Serinus canaria*], Leitner et al. 2001; Black-  
149 Capped Chickadees [*Poecile atricapillus*], Smulders 2005; Rufous-capped Warblers  
150 [*Basileuterus rufifrons*], Demko and Mennill 2019) and migrants (Gambel's White-crowned  
151 Sparrows [*Zonotrichia leucophrys gambelii*], Smith et al. 1995). However, we found no  
152 detectable seasonal differences in trill rate, the number of notes per syllable, number of inflection  
153 points, maximum entropy, or any measures of frequency. This outcome indicates that Carolina  
154 Wrens are singing similarly structured songs throughout the year rather than producing more  
155 complex songs during the breeding season as we predicted. One limitation of this study was that  
156 we were unable to compare the song repertoires of individual males between the breeding and  
157 nonbreeding seasons, so it remains unknown whether repertoire composition or the stereotypy of  
158 individual song types vary seasonally, which has been observed in other species (Smith et al.  
159 1997, Leitner et al. 2001).

160           The relative lack of seasonal variation in Carolina Wren song structure may be partially  
161 explained by the primary function of song in this species. As a temperate resident, Carolina  
162 Wrens defend territories year-round, and a persistent function of song appears to be in territorial  
163 behavior (Haggerty and Morton 2020). Maintaining a viable territory is not only important for  
164 breeding, but nonbreeding territories are critical for overwinter survival in this species,  
165 particularly during harsh winters when food resources become scarce and adult mortality can  
166 reach 90% (Morton 1982). This intense nonbreeding territoriality is further supported by the fact  
167 that Carolina Wrens ignore dear-enemy effects and engage in more territorial disputes during the  
168 nonbreeding season, and males with higher quality territories during harsh winters sing at higher  
169 rates than males with low quality territories (Morton and Shalter 1977, Morton 1982, Hyman  
170 2005). Additionally, unpaired females, which do not sing, are unable to maintain territories  
171 alone, but solo males can (Morton and Shalter 1977). Collectively, these observations suggest  
172 that song's year-round role in territoriality may be the most important selective force maintaining  
173 its consistent structure across the breeding and nonbreeding seasons.

174           Unlike many temperate songbirds, Carolina Wrens form long term pair bonds that are  
175 often established early in life before males develop a crystalized song (Morton and Shalter  
176 1977). Under these conditions, females likely choose mates based on a male's non-vocal  
177 attributes or the quality of his territory, which minimizes the traditional function of song in mate  
178 attraction. The presence of long-term genetic monogamy in Carolina Wrens (Haggerty et al.  
179 2001) also makes it unlikely that song functions in attracting extra-pair mates. However, male  
180 wrens increase their song rates at the beginning of breeding (Haggerty and Morton 2020), and  
181 our study supports a concurrent increase in song length and the number of repetitions of each  
182 syllable during the breeding season. Increasing song length and redundancy can increase the



183 detectability of the signal for all potential receivers, which would support functions in both inter  
184 and intrasexual communication during breeding (Price 2013). Independent of mate attraction,  
185 longer breeding songs may also function in within-pair communication as a contact signal  
186 (Baptista 1978) and in stimulating females into reproductive condition (Maney et al. 2007).

187         The underlying mechanism for the seasonal changes in song length could be due to a  
188 variety of factors, including changes in brain nuclei size or shifting hormonal controls. Multiple  
189 species of sparrows have divergent song structures in the fall when song control nuclei are  
190 significantly smaller (Smith et al 1995, 1997; Brenowitz et al. 1998), but other species such as  
191 Black-Capped Chickadees sing longer songs during the breeding season with no seasonal  
192 variation in the size of the song system nuclei (Smulders 2005). Male Carolina Wrens have  
193 larger song control nuclei than females (Nealen and Perkel 2000), but whether the size of these  
194 nuclei vary seasonally is unknown and represents an important topic for future research.  
195 Alternatively, changes in sex steroid concentrations or receptor densities and locations could  
196 cause seasonal song differences and may or may not work in conjunction with changes in brain  
197 nuclei size. Wild canaries, for example, produce longer songs with faster trill rates during the  
198 breeding season when plasma testosterone levels are significantly higher, but the size of at least  
199 two song system nuclei remains similar between breeding and nonbreeding (Leitner et al. 2001,  
200 Voigt and Leitner 2008). Elevated androgen levels appear to consistently increase song rates in  
201 seasonally breeding species, but the exact role of androgens in determining song structure,  
202 particularly during the nonbreeding season when plasma levels are often low, remains poorly  
203 understood (reviewed in Gahr 2020).

204         The majority of our assumptions about the ultimate and proximate mechanisms  
205 underlying birdsong structure and function are derived from studies of breeding songs in

206 temperature species. Nonbreeding songs are common, and their production is often regulated by  
207 mechanisms that cannot be easily explained by circulating levels of sex steroids (Gahr 2020).  
208 Songs produced outside the breeding season are also more likely shaped by functions in  
209 territoriality and competition rather than mate attraction and choice. Expanding our focus to  
210 species such as Carolina Wrens, which sing throughout the year, may provide new insights into  
211 the mechanisms of song production and the complexity of selective forces that shape song  
212 structure.

213

214

### Acknowledgments

215 We thank the Macaulay Library at the Cornell Lab of Ornithology, xeno-canto, and the Florida  
216 Museum of Natural History for use of their song recordings. We thank the Ohio Wesleyan  
217 University Summer Science Research Program for funding.

218

219

### Literature Cited

220 Baptista LF. 1978. Territorial, courtship and duet songs of the Cuban Grassquit (*Tiaris canora*).

221 *Journal für Ornithologie*. 119:91-101.

222 Bates DM, Mächler M, Bolker BM, Walker S. 2015. Package lme4: Linear mixed-effects

223 models using Eigen and S4. *Journal of Statistical Software*. 67:1-48.

224 Brenowitz,EA, Baptista LF, Lent K, Wingfield JC. 1998. Seasonal plasticity of the song control

225 system in wild Nuttall's White-crowned Sparrows. *Journal of Neurobiology*. 34:69-82.

226 Catchpole CK, Slater PJB. 2008. *Bird Song: Biological Themes and Variations*. Cambridge

227 University Press, Cambridge.

- 228 Center for Conservation Bioacoustics. 2011. Raven Pro: Interactive sound analysis software.  
229 Version 1.6. Ithaca, NY: Cornell Lab of Ornithology. Available from:  
230 <http://ravensoundsoftware.com/>.
- 231 Demko AD, Mennill, DJ. 2019. Rufous-Capped Warblers *Basileuterus Rufifrons* show seasonal,  
232 temporal and annual variation in song use. *Ibis*. 161:481–94.
- 233 Gahr, M. 2020. Seasonal Hormone Fluctuations and Song Structure of Birds. In *Coding*  
234 *Strategies in Vertebrate Acoustic Communication*, edited by Thierry Aubin and Nicolas  
235 Mathevon, 7:163–201.
- 236 Haggerty TM, Morton ES, Fleischer RC. 2001. Genetic Monogamy in Carolina Wrens  
237 (*Thryothorus ludovicianus*). *Auk*. 118:215–219.
- 238 Haggerty TM, Morton ES. 2020. Carolina Wren (*Thryothorus ludovicianus*). In: Poole AF,  
239 editor. *Birds of the World*. Ithaca (NY): Cornell Laboratory of Ornithology.  
240 <https://doi.org/10.2173/bow.carwre.01>
- 241 Hyman, J. 2005. Seasonal variation in response to neighbors and strangers by a territorial  
242 songbird. *Ethology*. 111:951-961.
- 243 Leitner S, Voigt C, Garcia-Segura LM, Van't Hof T, Gahr M. 2001. Seasonal activation and  
244 inactivation of song motor memories in wild canaries is not reflected in  
245 neuroanatomical changes of forebrain song areas. *Hormones and Behavior*. 40:160–  
246 168.
- 247 Maney DL, Goode CT, Lake JI, Lange HS, O'Brien S. 2007. Rapid neuroendocrine responses  
248 to auditory courtship signals. *Endocrinology*. 148:5614-5623.
- 249 Morton, ES, Shalter. MD. 1977. Vocal response to predators in pair-bonded Carolina Wrens.  
250 *Condor*. 79:222-227.

- 251 Morton, ES. 1982. "Grading, discreteness, redundancy, and motivation-structural rules." In  
252 Acoustic communication in birds, edited by D. E. Kroodsma and E. H. Miller, 183-212.
- 253 Morton, ES. 1987. The effects of distance and isolation on song-type sharing in the Carolina  
254 Wren. *Wilson Bulletin*. 99:601-610.
- 255 Nealen, PM and Perkel, DJ. 2000. Sexual dimorphism in the song system of the Carolina Wren  
256 *Thryothorus ludovicianus*. *Journal of Comparative Neurology*. 418:346-360.
- 257 Price, JJ. 2013. Why is birdsong so repetitive? Signal detection and the evolution of avian  
258 singing modes. *Behavior*. 2013:995-1013.
- 259 R Core Team. 2020. R: A language and environment for statistical computing. Vienna, Austria:  
260 R Foundation for Statistical Computing. <https://www.R-project.org/>.
- 261 Smith, G. Troy, Eliot A. Brenowitz, John C. Wingfield, Luis F. Baptista. 1995. Seasonal  
262 changes in song nuclei and song behavior in Gambel's White-Crowned Sparrows.  
263 *Journal of Neurobiology*. 28:114-125.
- 264 Smith G, Troy EA, Brenowitz MD, Beecher, Wingfield, JC. 1997. Seasonal changes in  
265 testosterone, neural attributes of song control nuclei, and song structure in wild  
266 songbirds. *The Journal of Neuroscience*. 17:6001-6010.
- 267 Smulders TV, Lisi ME, Tricoli E, Otter KA, Chruszcz B, Ratcliffe LM, DeVoogd TJ. 2006.  
268 Failure to detect seasonal changes in the song system nuclei of the Black-Capped  
269 Chickadee (*Poecile atricapillus*). *Journal of Neurobiology*. 66:991-1001.
- 270 Sorensen MC, Jenni-Eiermann S, Spottiswoode CN. 2016. Why do migratory birds sing on their  
271 tropical wintering grounds? *American Naturalist*. 187:E65-E76.

272 Voigt C, Leitner, S. 2008. Seasonality in song behaviour revisited: seasonal and annual variants  
273 and invariants in the song of the Domesticated Canary (*Serinus Canaria*). *Hormones*  
274 and Behavior. 54:373–378.

275

276

## Figure Captions

277 **Figure 1.** Representative spectrograms of Carolina Wren songs from the breeding (top) and  
278 nonbreeding (bottom) seasons. The darkness of the spectrograms does not represent the relative  
279 amplitudes of the songs.

280

281 **Figure 2.** Comparison of song measurements from Carolina Wrens that showed a significant  
282 difference between breeding and nonbreeding seasons. Each box represents the interquartile  
283 range and median, whiskers represent range of data within 1.5 times the interquartile range, and  
284 dots represent data points exceeding that range.  $*P < 0.01$

285

286

287

288

289

290

291

292

293

294 **Table 1.** Results of linear mixed model analysis for song measurements comparing breeding and  
 295 nonbreeding populations. All means are presented  $\pm$  1 SEM. Bolded values identify  $P < 0.05$ .

| Song Measurement                | Breeding Mean                   | Nonbreeding Mean                | $X^2_{df}$   | <i>P</i> -value   |
|---------------------------------|---------------------------------|---------------------------------|--------------|-------------------|
| <b>Song Length (sec)</b>        | <b>1.69<math>\pm</math>0.02</b> | <b>1.56<math>\pm</math>0.02</b> | <b>18.77</b> | <b>&lt; 0.001</b> |
| Maximum Frequency (Hz)          | 5483.0 $\pm$ 61.24              | 5453.8 $\pm$ 59.51              | 0.07         | 0.79              |
| Minimum Frequency (Hz)          | 1788.9 $\pm$ 16.68              | 1828.1 $\pm$ 17.71              | 2.06         | 0.15              |
| Frequency Bandwidth (Hz)        | 3694.03 $\pm$ 62.22             | 3625.70 $\pm$ 60.38             | 0.31         | 0.58              |
| Number of Inflection Points     | 94.96 $\pm$ 1.72                | 97.95 $\pm$ 1.91                | 0.01         | 0.92              |
| Maximum Entropy                 | 4.90 $\pm$ 0.02                 | 4.85 $\pm$ 0.03                 | 1.43         | 0.23              |
| <b>Number of Syllables/Song</b> | <b>4.78<math>\pm</math>0.09</b> | <b>4.26<math>\pm</math>0.08</b> | <b>11.9</b>  | <b>&lt; 0.01</b>  |
| Number of Notes/Syllable        | 4.86 $\pm$ 0.07                 | 4.92 $\pm$ 0.07                 | 0.006        | 0.94              |
| Trill Rate (syllables/sec)      | 2.79 $\pm$ 0.06                 | 2.76 $\pm$ 0.05                 | 0.06         | 0.8               |

296

297

298

299

300

301 **Figure 1**

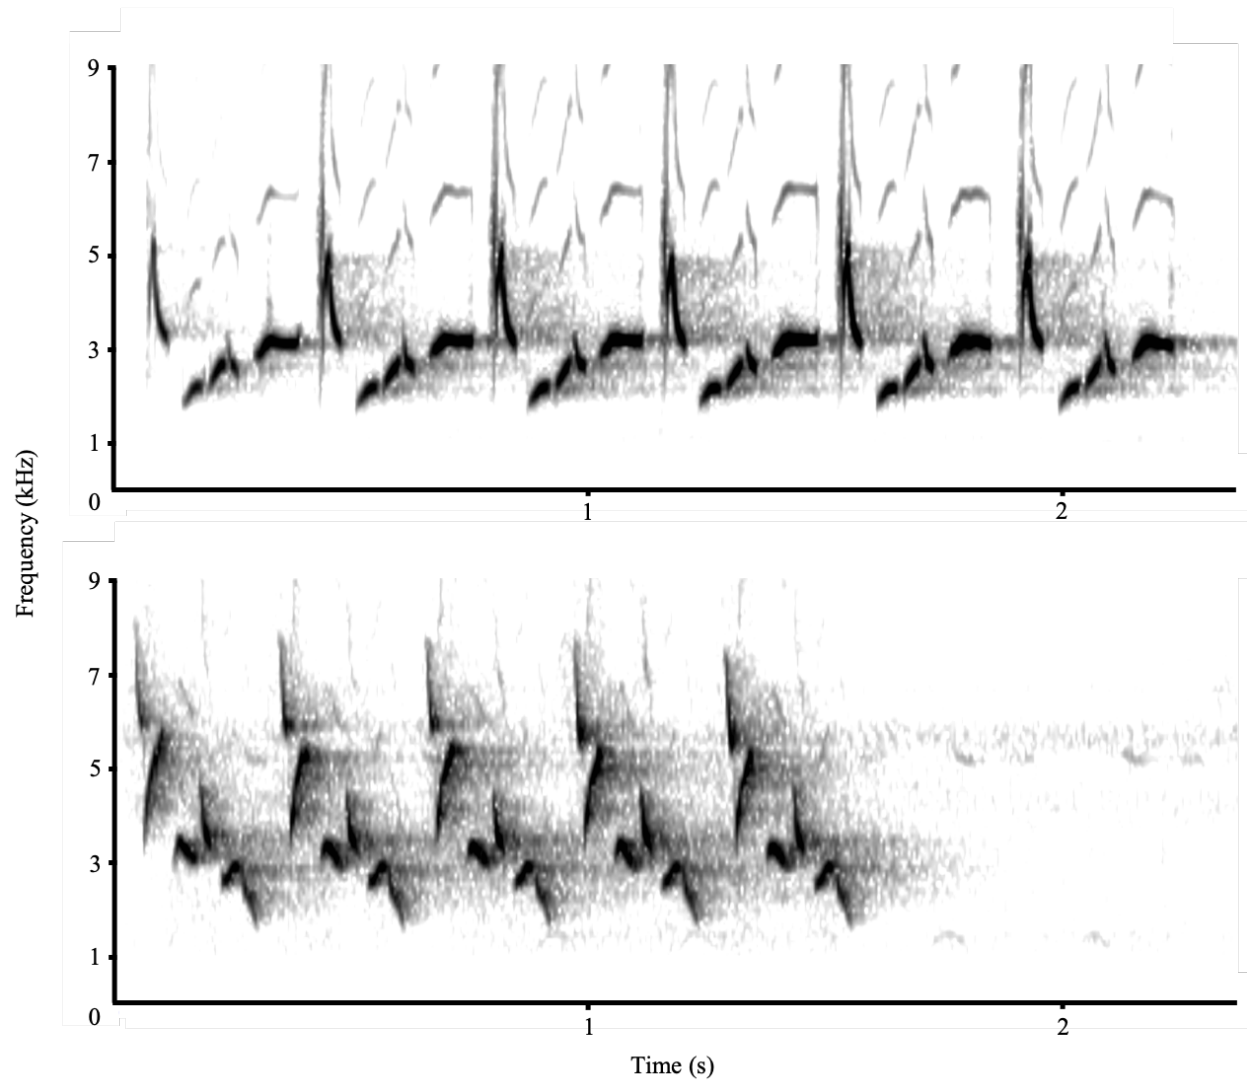

302

303

304

305

306

307

308

309

310 **Figure 2**

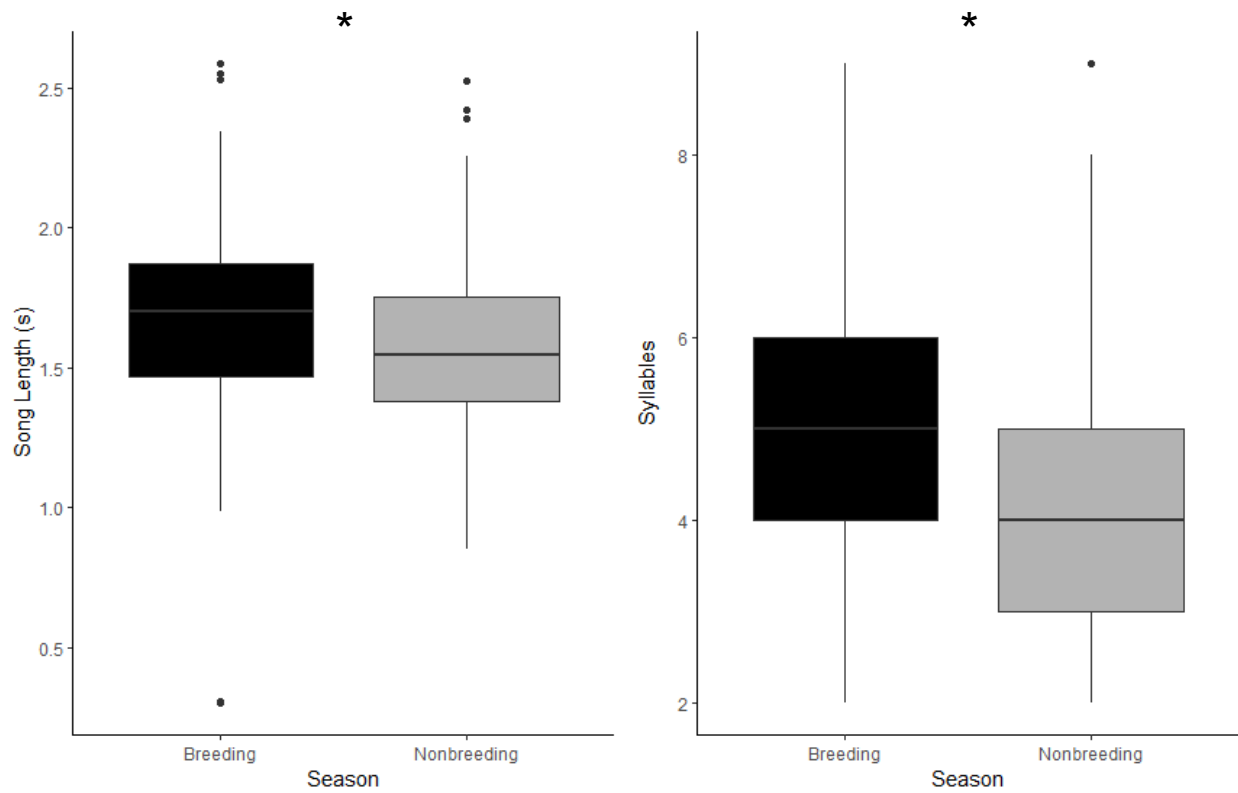

311  
312  
313  
314  
315  
316  
317  
318  
319  
320  
321



322 **Supplementary Table S1.** Reference information for the recordings obtained from online  
323 databases.

| Database Name    | Recording Identification Number | Date of Recording | Recordist Name      |
|------------------|---------------------------------|-------------------|---------------------|
| Macaulay Library | 9086                            | 2/12/1954         | Arthur A. Allen     |
| Macaulay Library | 9088                            | 4/26/1955         | Peter Paul Kellogg  |
| Macaulay Library | 9089                            | 4/27/1955         | Peter Paul Kellogg  |
| Macaulay Library | 9093                            | 4/24/1961         | Robert C. Stein     |
| Macaulay Library | 9094                            | 3/25/1962         | Randolph Little     |
| Macaulay Library | 9095                            | 3/28/1962         | Randolph Little     |
| Macaulay Library | 9096                            | 3/30/1962         | Randolph Little     |
| Macaulay Library | 9097                            | 6/9/1962          | James Kimball       |
| Macaulay Library | 9098                            | 6/11/1962         | James Kimball       |
| Macaulay Library | 9099                            | 5/1/1960          | Marian P. McChesney |
| Macaulay Library | 9200                            | 4/17/1963         | Robert C. Stein     |
| Macaulay Library | 9201                            | 4/18/1963         | Robert C. Stein     |
| Macaulay Library | 9203                            | 4/28/1963         | Robert C. Stein     |
| Macaulay Library | 9204                            | 4/30/1963         | Robert C. Stein     |
| Macaulay Library | 9205                            | 5/2/1963          | Robert C. Stein     |
| Macaulay Library | 9206                            | 5/7/1963          | Robert C. Stein     |

|                  |       |           |                     |
|------------------|-------|-----------|---------------------|
| Macaulay Library | 9208  | 4/27/1964 | Marian P. McChesney |
| Macaulay Library | 9210  | 4/14/1964 | Marian P. McChesney |
| Macaulay Library | 9215  | 4/26/1964 | Randolph Little     |
| Macaulay Library | 9216  | 5/10/1964 | Randolph Little     |
| Macaulay Library | 9217  | 3/19/1970 | Marian P. McChesney |
| Macaulay Library | 9219  | 7/21/1970 | James Kimball       |
| Macaulay Library | 9220  | 6/9/1962  | James Kimball       |
| Macaulay Library | 14665 | 5/5/1960  | Peter Paul Kellogg  |
| Macaulay Library | 26401 | 3/18/1979 | Randolph Little     |
| Macaulay Library | 26796 | 3/31/1980 | Margery R. Plymire  |
| Macaulay Library | 30296 | 5/3/1975  | Randolph Little     |
| Macaulay Library | 37351 | 5/3/1986  | Geoffrey A. Keller  |
| Macaulay Library | 37355 | 5/3/1986  | Geoffrey A. Keller  |
| Macaulay Library | 37370 | 5/4/1986  | Geoffrey A. Keller  |
| Macaulay Library | 38330 | 3/26/1986 | Ted Parker          |
| Macaulay Library | 40788 | 5/7/1988  | Gregory Budney      |
| Macaulay Library | 41373 | 3/5/1983  | Dolly Minis         |
| Macaulay Library | 41375 | 3/9/1983  | Dolly Minis         |
| Macaulay Library | 42394 | 8/9/1984  | Gregory Budney      |
| Macaulay Library | 45610 | 6/1/1988  | Ted Parker          |

|                  |        |           |                    |
|------------------|--------|-----------|--------------------|
| Macaulay Library | 51801  | 5/19/1989 | Ted Parker         |
| Macaulay Library | 63232  | 3/3/1966  | William W. H. Gunn |
| Macaulay Library | 72274  | 4/24/1992 | Geoffrey A. Keller |
| Macaulay Library | 73999  | 4/24/1992 | Geoffrey A. Keller |
| Macaulay Library | 74003  | 4/24/1992 | Geoffrey A. Keller |
| Macaulay Library | 77268  | 3/2/1996  | Wil Hershberger    |
| Macaulay Library | 84682  | 2/16/1997 | Wil Hershberger    |
| Macaulay Library | 84703  | 2/28/1997 | Wil Hershberger    |
| Macaulay Library | 100722 | 3/17/1999 | Wil Hershberger    |
| Macaulay Library | 100751 | 4/4/1999  | Wil Hershberger    |
| Macaulay Library | 105331 | 5/4/1994  | Geoffrey A. Keller |
| Macaulay Library | 105372 | 5/10/1994 | Geoffrey A. Keller |
| Macaulay Library | 105515 | 4/24/1995 | Geoffrey A. Keller |
| Macaulay Library | 105559 | 4/30/1995 | Geoffrey A. Keller |
| Macaulay Library | 128905 | 3/21/2005 | Gerrit Vyn         |
| Macaulay Library | 128919 | 3/17/2005 | Gerrit Vyn         |
| Macaulay Library | 129800 | 3/20/2006 | Randolph Little    |
| Macaulay Library | 132979 | 2/27/2007 | Michael Andersen   |
| Macaulay Library | 135379 | 5/5/2005  | Brian O'Shea       |
| Macaulay Library | 136203 | 3/13/2007 | Martha Fischer     |

|                  |        |           |                       |
|------------------|--------|-----------|-----------------------|
| Macaulay Library | 146530 | 3/23/2006 | Mark Robbins          |
| Macaulay Library | 147823 | 3/18/2005 | Benjamin Clock        |
| Macaulay Library | 147835 | 3/22/2005 | Benjamin Clock        |
| Macaulay Library | 165256 | 8/2/2010  | Hope Batcheller       |
| Macaulay Library | 172329 | 5/26/2011 | Mark Robbins          |
| Macaulay Library | 176214 | 6/30/2009 | Geoffrey A. Keller    |
| Macaulay Library | 183180 | 3/16/2014 | Mary Margaret Ferraro |
| Macaulay Library | 188894 | 9/16/2013 | Bob McGuire           |
| Macaulay Library | 191224 | 7/3/2012  | Wil Hershberger       |
| Macaulay Library | 196481 | 3/19/2011 | Bob McGuire           |
| Macaulay Library | 205452 | 4/5/2001  | Dustin Strom          |
| Macaulay Library | 213709 | 4/18/2008 | Bob McGuire           |
| Macaulay Library | 219744 | 6/4/2009  | Bob McGuire           |
| Macaulay Library | 225837 | 9/30/2009 | Bob McGuire           |
| Macaulay Library | 225838 | 9/30/2009 | Bob McGuire           |
| Macaulay Library | 225842 | 10/3/2009 | Bob McGuire           |
| Macaulay Library | 225862 | 10/4/2009 | Bob McGuire           |
| Macaulay Library | 225871 | 10/5/2009 | Bob McGuire           |
| Macaulay Library | 225873 | 10/5/2009 | Bob McGuire           |
| Macaulay Library | 225874 | 10/5/2009 | Bob McGuire           |

|                  |        |            |                 |
|------------------|--------|------------|-----------------|
| Macaulay Library | 225874 | 10/6/2009  | Bob McGuire     |
| Macaulay Library | 225876 | 10/5/2009  | Bob McGuire     |
| Macaulay Library | 225878 | 10/5/2009  | Bob McGuire     |
| Macaulay Library | 225987 | 12/3/2009  | Bob McGuire     |
| Macaulay Library | 229157 | 12/13/2009 | Bob McGuire     |
| Macaulay Library | 514794 | 4/17/2013  | Wil Hershberger |
| Macaulay Library | 514795 | 4/19/2013  | Wil Hershberger |
| Macaulay Library | 518367 | 3/25/2016  | Mark Robbins    |
| Macaulay Library | 539358 | 2/20/2018  | Wil Hershberger |
| Macaulay Library | 539360 | 2/26/2018  | Wil Hershberger |
| Macaulay Library | 539362 | 2/28/2018  | Wil Hershberger |
| Macaulay Library | 539365 | 3/1/2018   | Wil Hershberger |
| Macaulay Library | 539450 | 3/19/2018  | Wil Hershberger |
| Macaulay Library | 539579 | 3/24/2018  | Wil Hershberger |
| Macaulay Library | 539591 | 3/27/2018  | Wil Hershberger |
| Macaulay Library | 539593 | 3/31/2018  | Wil Hershberger |
| Macaulay Library | 539617 | 4/10/2018  | Wil Hershberger |
| Macaulay Library | 539635 | 4/19/2018  | Wil Hershberger |
| Macaulay Library | 539654 | 5/3/2018   | Wil Hershberger |
| Macaulay Library | 539709 | 5/21/2018  | Wil Hershberger |

|                  |          |           |                  |
|------------------|----------|-----------|------------------|
| Macaulay Library | 539715   | 5/26/18   | Wil Hershberger  |
| Macaulay Library | 539840   | 3/31/2018 | Wil Hershberger  |
| Macaulay Library | 20601731 | 10/27/15  | Paul Marvin      |
| Macaulay Library | 20628011 | 9/26/15   | Paul Marvin      |
| Macaulay Library | 22400231 | 12/27/15  | Colin Sumrall    |
| Macaulay Library | 34379131 | 9/5/16    | Colin Sumrall    |
| Macaulay Library | 40023621 | 11/15/16  | Kiehl Smith      |
| Macaulay Library | 40365141 | 11/19/16  | Robert O'Connell |
| Macaulay Library | 42326791 | 12/11/16  | Jeffrey Graham   |
| Macaulay Library | 43622601 | 12/17/16  | Patrick J. Blake |
| Macaulay Library | 45631001 | 1/16/17   | Colin Sumrall    |
| Macaulay Library | 48151561 | 2/12/17   | Colin Sumrall    |
| Macaulay Library | 48151961 | 2/12/17   | Colin Sumrall    |
| Macaulay Library | 48664211 | 2/18/17   | Ted Floyd        |
| Macaulay Library | 49018431 | 2/18/17   | Alexis Adair     |
| Macaulay Library | 67926261 | 9/4/17    | Brian Wulker     |
| Macaulay Library | 68476971 | 9/10/17   | Tucker Beamer    |
| Macaulay Library | 68741741 | 9/12/17   | David Simpson    |
| Macaulay Library | 69293331 | 9/17/17   | Loyan Beausoleil |
| Macaulay Library | 70740701 | 10/3/17   | Mike Stewart     |

|                  |          |          |                   |
|------------------|----------|----------|-------------------|
| Macaulay Library | 71182981 | 10/7/17  | Bryan Henson      |
| Macaulay Library | 71721071 | 10/13/17 | LynnErla Beegle   |
| Macaulay Library | 71993921 | 10/14/17 | Colin Sumrall     |
| Macaulay Library | 72009771 | 10/15/17 | Shelia Hargis     |
| Macaulay Library | 72051181 | 10/15/17 | Jon G.            |
| Macaulay Library | 72182531 | 9/15/17  | Jay McGowan       |
| Macaulay Library | 72436321 | 10/19/17 | Steven Biggers    |
| Macaulay Library | 73184661 | 10/26/17 | David Simpson     |
| Macaulay Library | 74099191 | 11/4/17  | Anne Armstrong    |
| Macaulay Library | 74731791 | 11/10/17 | Anne Armstrong    |
| Macaulay Library | 76101211 | 11/24/17 | Josh Fecteau      |
| Macaulay Library | 76596541 | 11/25/17 | David Simpson     |
| Macaulay Library | 79992891 | 12/31/17 | Gary Leavens      |
| Macaulay Library | 80508021 | 12/20/17 | William Hull      |
| Macaulay Library | 80737811 | 1/4/18   | Richard Bunn      |
| Macaulay Library | 80827551 | 12/21/17 | Jay McGowan       |
| Macaulay Library | 81754871 | 1/12/18  | Peter Hawrylyshyn |
| Macaulay Library | 82724911 | 1/20/18  | Brad Walker       |
| Macaulay Library | 82724911 | 1/20/18  | Brad Walker       |
| Macaulay Library | 86112531 | 2/16/18  | Kyle Jones        |

|                  |           |          |                       |
|------------------|-----------|----------|-----------------------|
| Macaulay Library | 86943401  | 2/21/18  | Jamie and Corri Inman |
| Macaulay Library | 86966091  | 2/20/18  | Ryan Sanderson        |
| Macaulay Library | 87646221  | 2/23/18  | Matt Schloss          |
| Macaulay Library | 90491751  | 2/17/18  | Liam Wolff            |
| Macaulay Library | 114533821 | 9/11/18  | Thomas Anderson       |
| Macaulay Library | 114735841 | 9/2/18   | Jim Ferrari           |
| Macaulay Library | 115042351 | 9/13/18  | Anne Armstrong        |
| Macaulay Library | 115392001 | 2/18/18  | Paul Marvin           |
| Macaulay Library | 115704891 | 9/21/18  | Richard A Fischer Sr. |
| Macaulay Library | 116277561 | 9/22/18  | Tim Lenz              |
| Macaulay Library | 116298371 | 9/25/18  | Mike Stewart          |
| Macaulay Library | 116755521 | 9/29/18  | Sandra Keller         |
| Macaulay Library | 117008151 | 9/30/18  | Ragupathy Kannan      |
| Macaulay Library | 117180771 | 9/30/18  | Richard A Fischer Sr. |
| Macaulay Library | 117378651 | 10/4/18  | Ragupathy Kannan      |
| Macaulay Library | 118165431 | 9/14/18  | Tom Kerr              |
| Macaulay Library | 118679321 | 10/13/18 | Gary Leavens          |
| Macaulay Library | 119016131 | 10/13/18 | Michael Mulqueen      |
| Macaulay Library | 119173611 | 10/15/18 | Martin Wall           |
| Macaulay Library | 119754781 | 10/7/18  | Michael S Taylor      |



|                  |           |          |                          |
|------------------|-----------|----------|--------------------------|
| Macaulay Library | 120813831 | 10/27/18 | Bill Tollefson           |
| Macaulay Library | 120911771 | 10/27/18 | Michael S Taylor         |
| Macaulay Library | 121788681 | 11/2//18 | Jeffrey Roth             |
| Macaulay Library | 122144801 | 11/5/18  | Simon Burton             |
| Macaulay Library | 122466281 | 11/7/18  | Martin Wall              |
| Macaulay Library | 122472181 | 11/7/18  | Tom Nolan                |
| Macaulay Library | 122489971 | 11/4/18  | John Hurd                |
| Macaulay Library | 123248851 | 11/11/18 | David Sarkozy cc         |
| Macaulay Library | 124519201 | 11/18/18 | Lionel Xavier Horn       |
| Macaulay Library | 125068331 | 11/8/18  | Christine Stoughton Root |
| Macaulay Library | 125221271 | 11/25/18 | Thomas Koffel            |
| Macaulay Library | 125475461 | 11/25/18 | Valerie Heemstra         |
| Macaulay Library | 126446931 | 12/2/18  | John O'Brien             |
| Macaulay Library | 126498941 | 11/29/18 | Kaleb Kroeker            |
| Macaulay Library | 129285141 | 12/16/18 | Simon Burton             |
| Macaulay Library | 129638871 | 12/17/18 | Simon Burton             |
| Macaulay Library | 133037651 | 12/31/18 | William Hull             |
| Macaulay Library | 133064161 | 12/31/18 | Kerry Loux               |
| Macaulay Library | 133079281 | 1/4/19   | John Kirk                |
| Macaulay Library | 133169171 | 1/4/19   | Robert Bochenek          |

|                  |           |         |                    |
|------------------|-----------|---------|--------------------|
| Macaulay Library | 133511921 | 1/6/19  | Ethan Ellis        |
| Macaulay Library | 133611101 | 1/6/19  | Robert Beauchamp   |
| Macaulay Library | 133611161 | 1/6/19  | Robert Beauchamp   |
| Macaulay Library | 133680581 | 1/6/19  | Georgia Doyle      |
| Macaulay Library | 133722851 | 1/6/19  | Valerie Heemstra   |
| Macaulay Library | 133947911 | 1/8/19  | Gary Stone         |
| Macaulay Library | 134182421 | 1/13/19 | Kelly Krechmer     |
| Macaulay Library | 134613591 | 1/12/19 | Colin Sumrall      |
| Macaulay Library | 134821421 | 1/13/19 | Shane Carroll      |
| Macaulay Library | 135591441 | 1/17/19 | John Kirk          |
| Macaulay Library | 135850001 | 1/18/19 | Charlie Bruggemann |
| Macaulay Library | 137846581 | 1/29/19 | S. Queen           |
| Macaulay Library | 139021451 | 2/4/19  | Anne Armstrong     |
| Macaulay Library | 139257931 | 1/26/19 | Martin Wall        |
| Macaulay Library | 139508341 | 2/7/19  | Anne Armstrong     |
| Macaulay Library | 140002321 | 2/10/19 | Michael Cheves     |
| Macaulay Library | 140703221 | 2/14/19 | Jeffrey Roth       |
| Macaulay Library | 140919511 | 2/16/19 | Mary McKittrick    |
| Macaulay Library | 141179941 | 2/17/19 | Brett Moyer        |
| Macaulay Library | 142035611 | 2/22/19 | Derek Lecy         |

|                  |           |          |                          |
|------------------|-----------|----------|--------------------------|
| Macaulay Library | 175291781 | 9/2/19   | John Kirk                |
| Macaulay Library | 175848781 | 9/6/19   | John Abrams              |
| Macaulay Library | 176439151 | 9/9/19   | Norman Soskel            |
| Macaulay Library | 177396281 | 9/16/19  | Nick Bayly (SELVA)       |
| Macaulay Library | 177714821 | 9/18/19  | Anne Armstrong           |
| Macaulay Library | 177933741 | 9/16/19  | Winston Caillouet        |
| Macaulay Library | 178076351 | 9/20/19  | Charles Shields          |
| Macaulay Library | 178170681 | 9/21/19  | Tom Nolan                |
| Macaulay Library | 178630751 | 9/23/19  | Anne Armstrong           |
| Macaulay Library | 179284801 | 9/27/19  | Joseph Salmieri          |
| Macaulay Library | 179337001 | 9/28/19  | Valerie Heemstra         |
| Macaulay Library | 179528131 | 9/28/19  | Tom Nolan                |
| Macaulay Library | 179590511 | 9/29/19  | Elissa Weidaw            |
| Macaulay Library | 180197591 | 10/2/19  | Jack and Shirley Foreman |
| Macaulay Library | 180270891 | 10/3/19  | Elissa Weidaw            |
| Macaulay Library | 180412431 | 10/4/19  | Steven Biggers           |
| Macaulay Library | 181873511 | 10/13/19 | Charlie Bruggemann       |
| Macaulay Library | 181937491 | 10/12/19 | Colin Sumrall            |
| Macaulay Library | 182283741 | 10/15/19 | Vidhya Sundar            |
| Macaulay Library | 182364331 | 10/14/19 | Shilo McDonald           |

|                  |           |          |                      |
|------------------|-----------|----------|----------------------|
| Macaulay Library | 183044071 | 10/19/19 | Vidhya Sundar        |
| Macaulay Library | 184100611 | 10/25/19 | Vidhya Sundar        |
| Macaulay Library | 184214831 | 10/22/19 | Tom Nolan            |
| Macaulay Library | 184303631 | 10/26/19 | Colin Sumrall        |
| Macaulay Library | 184463621 | 10/26/19 | Ed M. Brogie         |
| Macaulay Library | 184605951 | 10/23/19 | Jon Aird             |
| Macaulay Library | 184747431 | 9/2/19   | Laura Sebastianelli  |
| Macaulay Library | 185516741 | 11/2/19  | Valerie Heemstra     |
| Macaulay Library | 186469911 | 11/16/19 | Gary Chapin          |
| Macaulay Library | 188207141 | 11/16/19 | Jake Friebohle       |
| Macaulay Library | 188219371 | 11/16/19 | Will Anderson        |
| Macaulay Library | 188383801 | 11/17/19 | Norman Soskel        |
| Macaulay Library | 189653941 | 11/24/19 | Lisa Cancade Hackett |
| Macaulay Library | 190470641 | 11/29/19 | Norman Soskel        |
| Macaulay Library | 191700171 | 12/6/19  | Eric Wolman          |
| Macaulay Library | 191712011 | 12/6/19  | Valerie Heemstra     |
| Macaulay Library | 191932411 | 12/7/19  | Colin Sumrall        |
| Macaulay Library | 193087211 | 12/13/19 | Jake Friebohle       |
| Macaulay Library | 193582931 | 12/16/19 | Valerie Heemstra     |
| Macaulay Library | 194652311 | 12/22/19 | Isidro Montemayor    |

|                  |           |          |                  |
|------------------|-----------|----------|------------------|
| Macaulay Library | 194944331 | 12/24/19 | Unknown          |
| Macaulay Library | 194958371 | 12/24/19 | Unknown          |
| Macaulay Library | 194975691 | 12/24/19 | Dan Fox          |
| Macaulay Library | 195388101 | 12/15/19 | Martin Wall      |
| Macaulay Library | 195834731 | 12/29/19 | Will Anderson    |
| Macaulay Library | 196293701 | 12/29/19 | Martin Wall      |
| Macaulay Library | 196396011 | 12/21/19 | Matthew Spoor    |
| Macaulay Library | 196938531 | 1/3/20   | Anne Mytych      |
| Macaulay Library | 196975621 | 10/18/19 | Emmanuel Salas   |
| Macaulay Library | 197761951 | 1/6/20   | Valerie Heemstra |
| Macaulay Library | 198021491 | 1/7/20   | Valerie Heemstra |
| Macaulay Library | 198086551 | 1/8/20   | John Garver      |
| Macaulay Library | 198392541 | 1/6/20   | Jay Gilliam      |
| Macaulay Library | 199212981 | 1/13/20  | Valerie Heemstra |
| Macaulay Library | 199637011 | 1/9/20   | Lisa Hoffman     |
| Macaulay Library | 200136841 | 1/17/20  | Skipper Anding   |
| Macaulay Library | 200137011 | 1/17/20  | Skipper Anding   |
| Macaulay Library | 200482571 | 12/9/19  | Nathan Wahler    |
| Macaulay Library | 202548291 | 1/16/20  | Natasza Fontaine |
| Macaulay Library | 202725281 | 1/25/20  | Amy Swarr        |

|                  |           |          |                            |
|------------------|-----------|----------|----------------------------|
| Macaulay Library | 203543831 | 1/28/20  | Marco Vachon               |
| Macaulay Library | 206345581 | 1/26/20  | Roshan Vignarajah          |
| Macaulay Library | 206615021 | 1/31/20  | Ted Staton                 |
| Macaulay Library | 207906871 | 2/1/20   | Valerie Heemstra           |
| Macaulay Library | 208074551 | 2/8/20   | Tom Lally                  |
| Macaulay Library | 208804141 | 2/12/20  | Tyler Hodges               |
| Macaulay Library | 208842601 | 2/8/20   | Miguel Angel Aguilar Gomez |
| Macaulay Library | 209670211 | 2/16/20  | Amy Swarr                  |
| Macaulay Library | 209706081 | 2/8/20   | Robert Beauchamp           |
| Macaulay Library | 209868831 | 2/8/20   | Roshan Vignarajah          |
| Macaulay Library | 209923211 | 2/17/20  | Jeffrey Mann               |
| Macaulay Library | 210556201 | 2/18/20  | Lisa Saffell               |
| Macaulay Library | 210797951 | 2/17/20  | David Simpson              |
| Macaulay Library | 210926291 | 2/22/20  | Robert Irwin               |
| Macaulay Library | 211131861 | 2/19/20  | Amy Swarr                  |
| Macaulay Library | 211893411 | 2/26/20  | Taylor Sturm               |
| Macaulay Library | 212050061 | 2/27/20  | Mark Hawryluk              |
| Macaulay Library | 212167111 | 2/25/20  | Don Brode                  |
| Macaulay Library | 235550451 | 12/22/19 | Nicholas Martens           |

|                                      |            |          |                       |
|--------------------------------------|------------|----------|-----------------------|
| Florida Museum of<br>Natural History | FLMNH00005 | 1/25/74  | J.W. Hardy            |
| Florida Museum of<br>Natural History | FLMNH00009 | 1/26/74  | J.W. Hardy            |
| Florida Museum of<br>Natural History | FLMNH01028 | 1/27/75  | Barbara and David Lee |
| Florida Museum of<br>Natural History | FLMNH01036 | 1/27/75  | Barbara and David Lee |
| Florida Museum of<br>Natural History | FLMNH01123 | 11/24/74 | David Lee             |
| Florida Museum of<br>Natural History | FLMNH01204 | 4/14/75  | J.W. Hardy            |
| Florida Museum of<br>Natural History | FLMNH01204 | 4/14/75  | J.W. Hardy            |
| Florida Museum of<br>Natural History | FLMNH01452 | 8/17/75  | Richard A Bradley     |
| Florida Museum of<br>Natural History | FLMNH03823 | 5/10/78  | Richard A Bradley     |
| Florida Museum of<br>Natural History | FLMNH04708 | 1/11/79  | J.W. Hardy            |
| Florida Museum of<br>Natural History | FLMNH04738 | 4/20/79  | J.W. Hardy            |
| Florida Museum of<br>Natural History | FLMNH04746 | 6/8/79   | J.W. Hardy            |

|                                      |            |         |                                 |
|--------------------------------------|------------|---------|---------------------------------|
| Florida Museum of<br>Natural History | FLMNH05140 | 9/2/77  | Phillip Gaddis                  |
| Florida Museum of<br>Natural History | FLMNH05210 | 4/18/80 | J.W. Hardy                      |
| Florida Museum of<br>Natural History | FLMNH05246 | 4/30/78 | Phillip Gaddis                  |
| Florida Museum of<br>Natural History | FLMNH06118 | 3/7/81  | J.W. Hardy                      |
| Florida Museum of<br>Natural History | FLMNH06132 | 3/12/82 | J.W. Hardy                      |
| Florida Museum of<br>Natural History | FLMNH06134 | 3/12/82 | J.W. Hardy                      |
| Florida Museum of<br>Natural History | FLMNH06135 | 3/13/82 | J.W. Hardy                      |
| Florida Museum of<br>Natural History | FLMNH07124 | 4/21/85 | Lawrence Kilham & Walter Taylor |
| Florida Museum of<br>Natural History | FLMNH07124 | 4/21/85 | Lawrence Kilham & Walter Taylor |
| Florida Museum of<br>Natural History | FLMNH07125 | 4/24/85 | Walter Taylor                   |
| Florida Museum of<br>Natural History | FLMNH07125 | 4/24/85 | Walter Taylor                   |
| Florida Museum of<br>Natural History | FLMNH07127 | 4/26/85 | Walter Taylor                   |



|                                      |            |          |                  |
|--------------------------------------|------------|----------|------------------|
| Florida Museum of<br>Natural History | FLMNH07133 | 6/3/85   | Walter Taylor    |
| Florida Museum of<br>Natural History | FLMNH07136 | 5/2/85   | Walter Taylor    |
| Florida Museum of<br>Natural History | FLMNH07136 | 5/2/85   | Walter Taylor    |
| Florida Museum of<br>Natural History | FLMNH07136 | 5/2/85   | Walter Taylor    |
| Florida Museum of<br>Natural History | FLMNH07138 | 5/2/85   | Walter Taylor    |
| Florida Museum of<br>Natural History | FLMNH07269 | 10/20/84 | Michael McMillan |
| Florida Museum of<br>Natural History | FLMNH07269 | 10/20/84 | Michael McMillan |
| Florida Museum of<br>Natural History | FLMNH11486 | 4/9/89   | Laurie Eberhardt |
| Florida Museum of<br>Natural History | FLMNH11487 | 2/5/89   | Laurie Eberhardt |
| Florida Museum of<br>Natural History | FLMNH23683 | 5/15/77  | Phillip Gaddis   |
| Florida Museum of<br>Natural History | FLMNH23688 | 5/15/77  | Phillip Gaddis   |
| Florida Museum of<br>Natural History | FLMNH23692 | 5/20/77  | Phillip Gaddis   |

|                                      |            |         |                |
|--------------------------------------|------------|---------|----------------|
| Florida Museum of<br>Natural History | FLMNH23869 | 3/13/78 | Phillip Gaddis |
| Florida Museum of<br>Natural History | FLMNH23963 | 10/5/78 | Phillip Gaddis |
| Florida Museum of<br>Natural History | FLMNH24024 | 1/4/79  | Phillip Gaddis |
| Florida Museum of<br>Natural History | FLMNH28086 | Unknown | Unknown        |
| Florida Museum of<br>Natural History | FLMNH30384 | 2/6/17  | Unknown        |
| Florida Museum of<br>Natural History | FLMNH30391 | 3/17/18 | Unknown        |
| Florida Museum of<br>Natural History | FLMNH30392 | 3/17/18 | Unknown        |
| Florida Museum of<br>Natural History | FLMNH30396 | 3/17/18 | Unknown        |
| Florida Museum of<br>Natural History | FLMNH30397 | 3/24/18 | Unknown        |
| Florida Museum of<br>Natural History | FLMNH30398 | 3/24/18 | Unknown        |
| Florida Museum of<br>Natural History | FLMNH30399 | 3/24/18 | Unknown        |
| Florida Museum of<br>Natural History | FLMNH30401 | 3/26/18 | Unknown        |

|                                      |            |          |             |
|--------------------------------------|------------|----------|-------------|
| Florida Museum of<br>Natural History | FLMNH30401 | 3/26/18  | Unknown     |
| Florida Museum of<br>Natural History | FLMNH30433 | 4/21/18  | Unknown     |
| Florida Museum of<br>Natural History | FLMNH30510 | 3/10/19  | Unknown     |
| Florida Museum of<br>Natural History | FLMNH31170 | 12/31/19 | Tom Webber  |
| Florida Museum of<br>Natural History | FLMNH31174 | 3/15/20  | Tom Webber  |
| Florida Museum of<br>Natural History | FLMNH31179 | 3/19/20  | Tom Webber  |
| Florida Museum of<br>Natural History | FLMNH31184 | 3/27/20  | Tom Webber  |
| Florida Museum of<br>Natural History | FLMNH31188 | 3/28/20  | Tom Webber  |
| Florida Museum of<br>Natural History | FLMNH31191 | 4/1/20   | Tom Webber  |
| Florida Museum of<br>Natural History | FLMNH31207 | 5/2/20   | Tom Webber  |
| Florida Museum of<br>Natural History | FLMNH31213 | 5/2/20   | Tom Webber  |
| Florida Museum of<br>Natural History | FLMNH31215 | 5/11/20  | Tom Webber  |
| Xeno Canto                           | XC103957   | 6/17/12  | Mike Nelson |

|            |          |           |                  |
|------------|----------|-----------|------------------|
| Xeno Canto | XC109026 | 5/22/12   | Andrew Spencer   |
| Xeno Canto | XC112511 | 1/20/12   | Liam Wolff       |
| Xeno Canto | XC112512 | 5/3/12    | Liam Wolffe      |
| Xeno Canto | XC116317 | 8/25/10   | Daniel Parker    |
| Xeno Canto | XC1210   | 5/11/92   | Don Jones        |
| Xeno Canto | XC122452 | 8/5/12    | Chris Harrison   |
| Xeno Canto | XC123347 | 3/13/11   | Chris Harrison   |
| Xeno Canto | XC124068 | 1/29/12   | Chris Harrison   |
| Xeno Canto | XC124764 | 4/25/1999 | Thomas G. Graves |
| Xeno Canto | XC12871  | 4/23/07   | Chris Parrish    |
| Xeno Canto | XC12996  | 4/26/07   | Chris Parrish    |
| Xeno Canto | XC130535 | 4/13/13   | Mike Nelson      |
| Xeno Canto | XC133669 | 5/4/13    | Kate Lovette     |
| Xeno Canto | XC136273 | 6/4/13    | Dan Lane         |
| Xeno Canto | XC140964 | 4/22/13   | Bernard Bousquet |
| Xeno Canto | XC140967 | 4/22/13   | Bernard Bousquet |
| Xeno Canto | XC141031 | 4/25/13   | Bernard Bousquet |
| Xeno Canto | XC141460 | 6/27/13   | Mike Nelson      |
| Xeno Canto | XC141908 | 7/7/13    | Amy Davis        |
| Xeno Canto | XC143792 | 7/12/13   | Paul Marvin      |
| Xeno Canto | XC147168 | 9/9/13    | Bobby Wilcox     |
| Xeno Canto | XC147174 | 9/9/13    | Bobby Wilcox     |
| Xeno Canto | XC15245  | 9/26/07   | Chris Parrish    |

|            |          |          |                    |
|------------|----------|----------|--------------------|
| Xeno Canto | XC161207 | 10/25/11 | Daniel Parker      |
| Xeno Canto | XC168616 | 7/27/10  | Paul Driver        |
| Xeno Canto | XC168619 | 2/28/13  | Paul Driver        |
| Xeno Canto | XC169157 | 3/2/14   | Paul Marvin        |
| Xeno Canto | XC169158 | 3/6/14   | Paul Marvin        |
| Xeno Canto | XC173577 | 3/10/14  | Paul Marvin        |
| Xeno Canto | XC174543 | 4/14/14  | Daniel Parker      |
| Xeno Canto | XC175156 | 4/19/14  | Daniel Parker      |
| Xeno Canto | XC175337 | 4/14/14  | Jim Holmes         |
| Xeno Canto | XC175465 | 4/21/14  | Daniel Parker      |
| Xeno Canto | XC178303 | 5/15/14  | Russ Wigh          |
| Xeno Canto | XC18247  | 3/6/08   | Chris Parrish      |
| Xeno Canto | XC200998 | 10/25/14 | Jack Hurd          |
| Xeno Canto | XC20434  | 5/5/08   | Chris Parrish      |
| Xeno Canto | XC208938 | 11/26/14 | Sander Pieterse    |
| Xeno Canto | XC210728 | 3/24/90  | Robert Benson      |
| Xeno Canto | XC217121 | 8/26/14  | Terry Davis        |
| Xeno Canto | XC231097 | 4/10/98  | Peter Boesman      |
| Xeno Canto | XC234667 | 4/7/15   | Danny Zapata-Henao |
| Xeno Canto | XC236014 | 4/15/15  | Danny Zapata-Henao |
| Xeno Canto | XC236569 | 4/18/15  | Jim Holmes         |
| Xeno Canto | XC236767 | 4/16/15  | Ted Floyd          |
| Xeno Canto | XC247310 | 4/4/15   | J.R. Rigby         |

|            |          |           |                    |
|------------|----------|-----------|--------------------|
| Xeno Canto | XC248139 | 6/6/15    | Paul Driver        |
| Xeno Canto | XC254936 | 4/10/15   | Nick Komar         |
| Xeno Canto | XC254937 | 4/10/15   | Nick Komar         |
| Xeno Canto | XC255711 | 7/8/15    | Antonio Xeira      |
| Xeno Canto | XC278596 | 9/8/15    | Bobby Wilcox       |
| Xeno Canto | XC286403 | 9/13/15   | Bobby Wilcox       |
| Xeno Canto | XC289890 | 3/28/06   | Nathan Pieplow     |
| Xeno Canto | XC290036 | 11/14/15  | J.R. Rigby         |
| Xeno Canto | XC297788 | 1/1/16    | Matthew Schenck    |
| Xeno Canto | XC301187 | 10/6/15   | C. Michael Stinson |
| Xeno Canto | XC301326 | 1/25/2016 | Jerald R           |
| Xeno Canto | XC301664 | 1/28/16   | C. Michael Stinson |
| Xeno Canto | XC305161 | 2/28/16   | Matt Brady         |
| Xeno Canto | XC309890 | 4/1/16    | Hal Mitchell       |
| Xeno Canto | XC309920 | 4/1/16    | J.R. Rigby         |
| Xeno Canto | XC309921 | 4/1/16    | J.R. Rigby         |
| Xeno Canto | XC314878 | 4/30/16   | Jim Holmes         |
| Xeno Canto | XC316922 | 5/16/16   | Matt Wistrand      |
| Xeno Canto | XC317252 | 5/18/16   | Jerald R           |
| Xeno Canto | XC31802  | 5/3/08    | James Eckert       |
| Xeno Canto | XC321338 | 6/10/16   | Matt Baumann       |
| Xeno Canto | XC321866 | 6/3/16    | Bobby Wilcox       |
| Xeno Canto | XC322019 | 6/4/16    | Bobby Wilcox       |

|            |          |          |                 |
|------------|----------|----------|-----------------|
| Xeno Canto | XC322022 | 6/4/16   | Bobby Wilcox    |
| Xeno Canto | XC323733 | 5-31-15  | Terry Davis     |
| Xeno Canto | XC328707 | 5/14/15  | Antonio Xeira   |
| Xeno Canto | XC332580 | 8/13/16  | Bobby Wilcox    |
| Xeno Canto | XC332606 | 8/13/16  | Bobby Wilcox    |
| Xeno Canto | XC332653 | 8/24/16  | Bobby Wilcox    |
| Xeno Canto | XC332765 | 8/25/16  | Jerald R        |
| Xeno Canto | XC333688 | 8/7/16   | Eric Burris     |
| Xeno Canto | XC333595 | 4/25/09  | Andrew Spencer  |
| Xeno Canto | XC340492 | 10/7/16  | Michael Lester  |
| Xeno Canto | XC343414 | 11/19/16 | Rob O'Connell   |
| Xeno Canto | XC343415 | 11/19/16 | Rob O'Connell   |
| Xeno Canto | XC343416 | 11/19/16 | Rob O'Connell   |
| Xeno Canto | XC34803  | 5/18/09  | Andrew Spencer  |
| Xeno Canto | XC348109 | 12/27/16 | Patrick Blake   |
| Xeno Canto | XC353922 | 2/1/17   | Brian Henderson |
| Xeno Canto | XC356473 | 2/22/17  | Joseph Bourget  |
| Xeno Canto | XC358185 | 1/19/17  | Thomas Magarian |
| Xeno Canto | XC358190 | 1/19/17  | Thomas Magarian |
| Xeno Canto | XC362046 | 8/7/16   | Matt Wistrand   |
| Xeno Canto | XC363524 | 4/8/17   | Brian Murphy    |
| Xeno Canto | XC363525 | 4/8/17   | Brian Murphy    |
| Xeno Canto | XC364592 | 4/14/17  | Brian Murphy    |

|            |          |          |                    |
|------------|----------|----------|--------------------|
| Xeno Canto | XC365748 | 11/26/16 | Vicki Dern         |
| Xeno Canto | XC366387 | 2/4/15   | Antonio Xeira      |
| Xeno Canto | XC366604 | 3/15/15  | Antonio Xeira      |
| Xeno Canto | XC370505 | 5/12/17  | Eric DeFonso       |
| Xeno Canto | XC370940 | 5/13/17  | Eric DeFonso       |
| Xeno Canto | XC371070 | 5/15/17  | Eric DeFonso       |
| Xeno Canto | XC371639 | 5/23/17  | William Whitehead  |
| Xeno Canto | XC372261 | 5/27/17  | Ken Blankenship    |
| Xeno Canto | XC383962 | 5/5/15   | Antonio Xeira      |
| Xeno Canto | XC384029 | 7/10/15  | Antonio Xeira      |
| Xeno Canto | XC391460 | 10/23/17 | Peter Boesman      |
| Xeno Canto | XC404487 | 3/4/18   | Amanda             |
| Xeno Canto | XC406663 | 3/18/18  | Matt Wistrand      |
| Xeno Canto | XC408641 | 8/6/16   | Linda L. Stehlik   |
| Xeno Canto | XC412667 | 4/24/18  | Nicholas Comparato |
| Xeno Canto | XC416559 | 5/3/18   | Sue Riffe          |
| Xeno Canto | XC416822 | 5/4/18   | Sue Riffe          |
| Xeno Canto | XC425814 | 7/1/18   | Meena Haribal      |
| Xeno Canto | XC429067 | 4/14/18  | Bruce Lagerquist   |
| Xeno Canto | XC432885 | 8/2/18   | Nick Komar         |
| Xeno Canto | XC451901 | 9/16/18  | Paul Marvin        |
| Xeno Canto | XC452778 | 12/14/17 | Paul Marvin        |
| Xeno Canto | XC454065 | 1/28/19  | Edward Caillouet   |



|            |          |          |                    |
|------------|----------|----------|--------------------|
| Xeno Canto | XC457190 | 5/13/18  | Will Sweet         |
| Xeno Canto | XC464175 | 3/24/19  | Bruce Lagerquist   |
| Xeno Canto | XC466690 | 4/14/19  | Brian Hendrix      |
| Xeno Canto | XC468714 | 4/26/19  | William Whitehead  |
| Xeno Canto | XC469529 | 4/29/19  | Brian Hendrix      |
| Xeno Canto | XC472499 | 5/10/19  | Brian Hendrix      |
| Xeno Canto | XC477366 | 12/4/17  | Matthew L. Brady   |
| Xeno Canto | XC477368 | 12/4//17 | Matthew L. Brady   |
| Xeno Canto | XC477391 | 5/15/19  | Sue Riffe          |
| Xeno Canto | XC477595 | 5/15/19  | Sue Riffe          |
| Xeno Canto | XC481961 | 6/14/19  | Daniel Parker      |
| Xeno Canto | XC487506 | 5/2/19   | Lance A. M. Benner |
| Xeno Canto | XC492589 | 8/14/19  | Brian Hendrix      |
| Xeno Canto | XC494030 | 8/24/19  | William Whitehead  |
| Xeno Canto | XC498647 | 4/1/17   | Jacob Saucier      |
| Xeno Canto | XC498648 | 4/1/17.  | Jacob Saucier      |
| Xeno Canto | XC498768 | 4/3/17   | Jacob Saucier      |
| Xeno Canto | XC498947 | 4/6/17.  | Jacob Saucier      |
| Xeno Canto | XC502630 | 10/15/19 | William Whitehead  |
| Xeno Canto | XC511443 | 10/7/19  | Bobby Wilcox       |
| Xeno Canto | XC516974 | 12/30/19 | Bobby Wilcox       |
| Xeno Canto | XC52363  | 5/21/10  | Mike Nelson        |
| Xeno Canto | XC534174 | 3/1/20   | Bobby Wilcox       |

|            |          |          |                |
|------------|----------|----------|----------------|
| Xeno Canto | XC534668 | 3/15/20  | Brian Hendrix  |
| Xeno Canto | XC537553 | 10/21/19 | Sue Riffe      |
| Xeno Canto | XC539275 | 3/24/20  | Aidan Place    |
| Xeno Canto | XC540855 | 4/2/20   | Meena Haribal  |
| Xeno Canto | XC542146 | 4/5/20   | Joseph Keating |
| Xeno Canto | XC543512 | 4/9/20   | Jeremy Nance   |
| Xeno Canto | XC556630 | 4/18/19  | Cao Brito      |
| Xeno Canto | XC556632 | 4/26/19. | Cao Brito      |
| Xeno Canto | XC558225 | 5/14/20  | Brian Hendrix  |
| Xeno Canto | XC56154  | 5/20/10  | Chuck Davis    |
| Xeno Canto | XC56157  | 5/20/10  | Chuck Davis    |
| Xeno Canto | XC56228  | 5/31/10  | Chuck Davis    |
| Xeno Canto | XC563199 | 5/29/20  | Brian Hendrix  |
| Xeno Canto | XC563615 | 5/30/20  | Brian Hendrix  |
| Xeno Canto | XC563616 | 5/30/20  | Brian Hendrix  |
| Xeno Canto | XC56415  | 3/17/09  | Hilke Breder   |
| Xeno Canto | XC564895 | 6/3/20   | Amanda         |
| Xeno Canto | XC62773  | 9/29/10  | Mike Nelson    |
| Xeno Canto | XC65136  | 11/6/10  | Todd Wilson    |
| Xeno Canto | XC77133  | 4/22/11  | Stuart Fisher  |

324

325

326 **Supplementary Table 2S:** Results of linear mixed model analysis for song measurements  
 327 comparing breeding (N = 264) and nonbreeding (N = 177) populations when transitional months  
 328 between seasons were removed (February and September). All means are presented  $\pm$  1 SEM.  
 329 Bolded values identify  $P < 0.05$ .  
 330

| Song Measurement                | Breeding Mean                   | Nonbreeding Mean                | $X^2_1$         | <i>P</i> -value |
|---------------------------------|---------------------------------|---------------------------------|-----------------|-----------------|
| <b>Song Length (sec)</b>        | <b>1.69<math>\pm</math>0.02</b> | <b>1.57<math>\pm</math>0.02</b> | <b>10.35128</b> | <b>&lt;0.05</b> |
| Maximum Frequency (Hz)          | 5464.60 $\pm$ 61.63             | 5475.05 $\pm$ 75.98             | 0.04127943      | 0.84            |
| Minimum Frequency (Hz)          | 1812.73 $\pm$ 16.85             | 1801.41 $\pm$ 21.16             | 3.670049        | 0.06            |
| Frequency Bandwidth (Hz)        | 3651.86 $\pm$ 62.64             | 3673.64 $\pm$ 78.19             | 0.4214665       | 0.52            |
| Number of Inflection Points     | 96.95 $\pm$ 1.74                | 95.54 $\pm$ 2.29                | 0.1506212       | 0.7             |
| Maximum Entropy                 | 4.85 $\pm$ 0.02                 | 4.91 $\pm$ 0.03                 | 0.3621236       | 0.55            |
| <b>Number of Syllables/Song</b> | <b>4.75<math>\pm</math>0.09</b> | <b>4.28<math>\pm</math>0.09</b> | <b>8.285182</b> | <b>&lt;0.05</b> |
| Number of Notes/Syllable        | 4.90 $\pm$ 0.07                 | 4.86 $\pm$ 0.08                 | 0.007514044     | 0.93            |
| Trill Rate (syllables/sec)      | 3.04 $\pm$ 0.06                 | 3.16 $\pm$ 0.06                 | 5.571908        | 0.81            |

331
